# Supplementary material for: Heterostructure construction of covalent organic frameworks/Ti3C2-MXene for high-efficiency electrocatalytic CO2 reduction
Source: Royal Society of Chemistry journal article supplement (doi:10.1039/d3gc03778a), 2023-12-21
Supplement: d3gc03778a1.pdf [file d3gc03778a1.pdf]

## Supporting Information

### Heterostructure Construction of Covalent Organic Framework/Ti<sub>3</sub>C<sub>2</sub>-MXene for High-efficiency Electrocatalytic CO<sub>2</sub> Reduction

Liyuan Zhou,<sup>a</sup> Qingyong Tian,<sup>a\*</sup> Xiaoqing Shang,<sup>a</sup> Yanming Zhao,<sup>a</sup> Weijing Yao,<sup>b</sup>

Hongpo Liu,<sup>a</sup> Qun Xu<sup>a\*</sup>

#### Supplementary Text

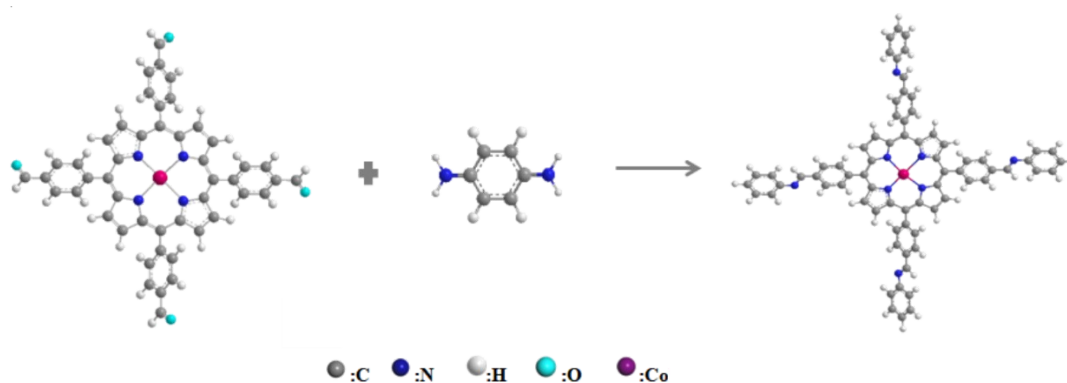

**Figure S1.** Synthetic route diagram of Por-COF-Co with the reaction solvent of 1, 2- dichlorobenzene、 butanol and 6M acetic acid and reaction conditions of 120 °C for three days.

---

\*To whom correspondence should be addressed. Tel: +86-27-63886819. E-mail: [tianqy@zzu.edu.cn](mailto:tianqy@zzu.edu.cn) (Q. Tian) and [qunxu@zzu.edu.cn](mailto:qunxu@zzu.edu.cn) (Q. Xu).

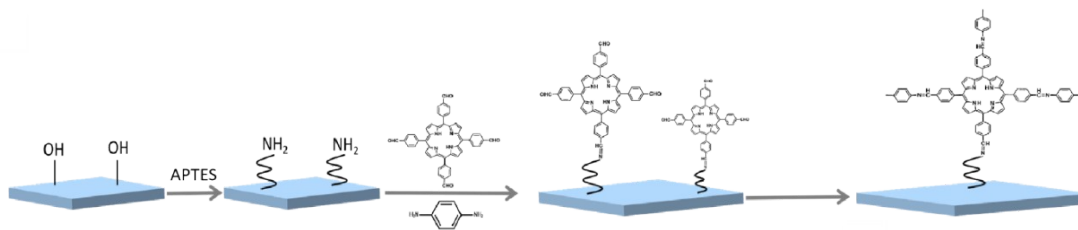

**Figure S2.** Schematic diagram of in-situ growth of COF on the surface of MXene nanosheets using Schiff base condensation polymerization method.

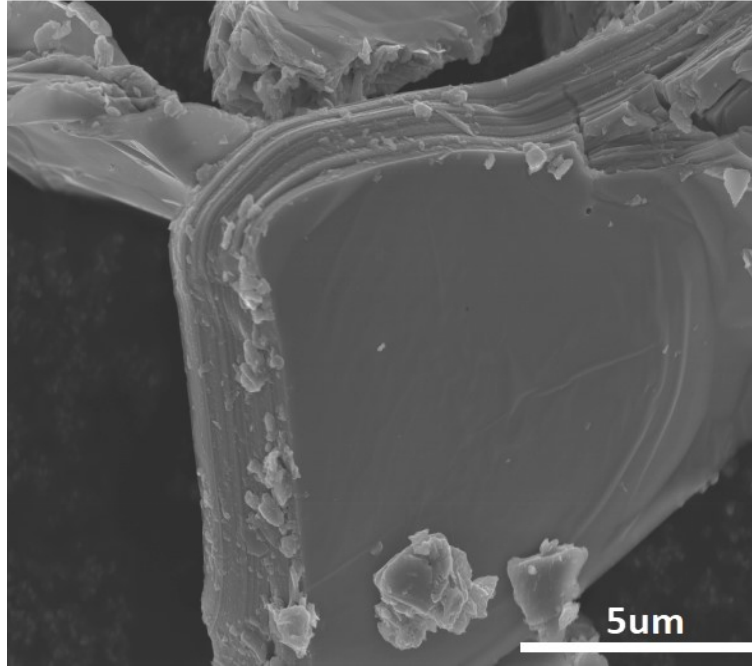

**Figure S3.** SEM images of Ti<sub>3</sub>C<sub>2</sub> MXene nanosheets.

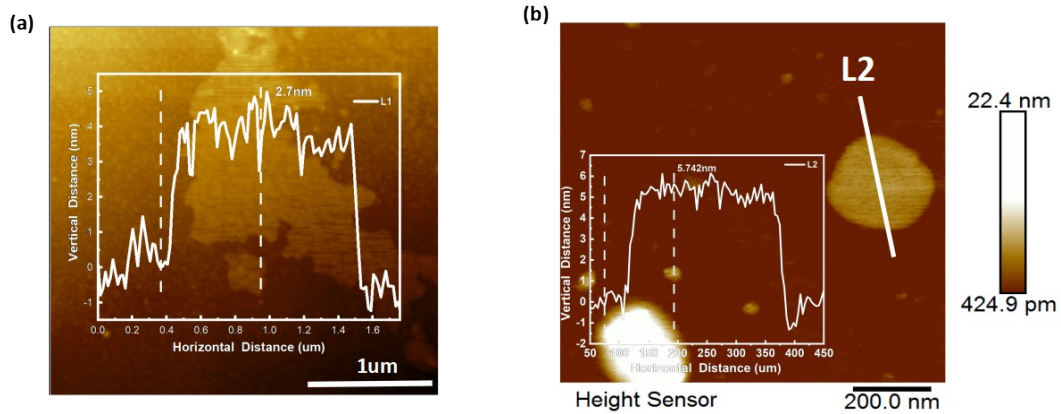

**Figure S4.** AFM image with the measured thickness of (a)  $\text{Ti}_3\text{C}_2$  MXene nanosheets, (b) Por-COF.

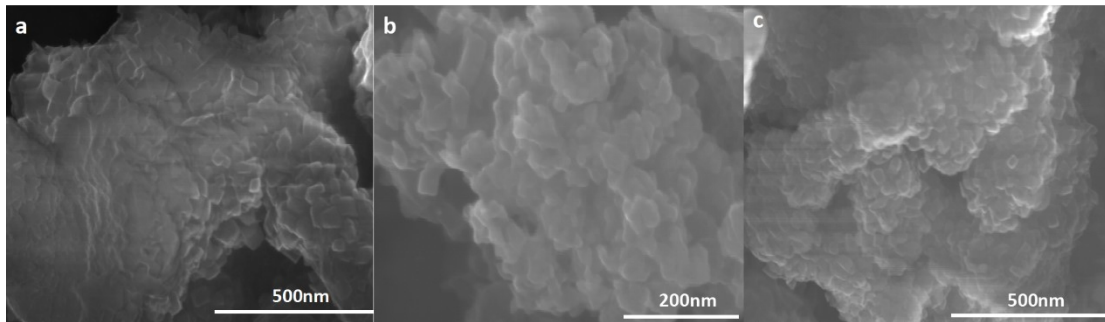

**Figure S5.** SEM images of (a) MXene@Por-COF-Co-3 heterostructure, (b) MXene@Por-COF-Co-5 heterostructure, (c) MXene@Por-COF-Co-7 heterostructure.

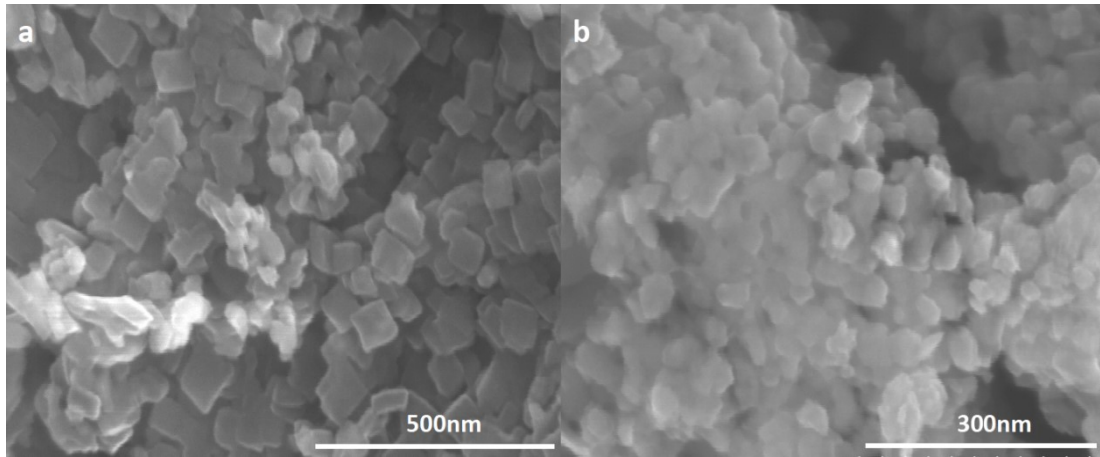

**Figure S6.** SEM images of (a) MXene@Por-COF-3 heterostructure, (b) MXene@Por-COF-5 heterostructure.

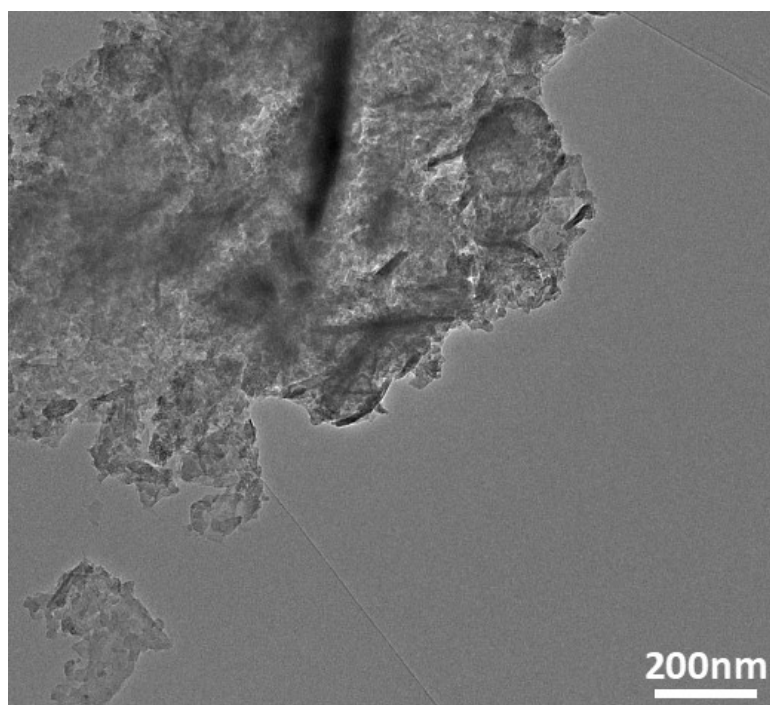

**Figure S7.** TEM images of MXene@Por-COF-Co-7 heterostructure.

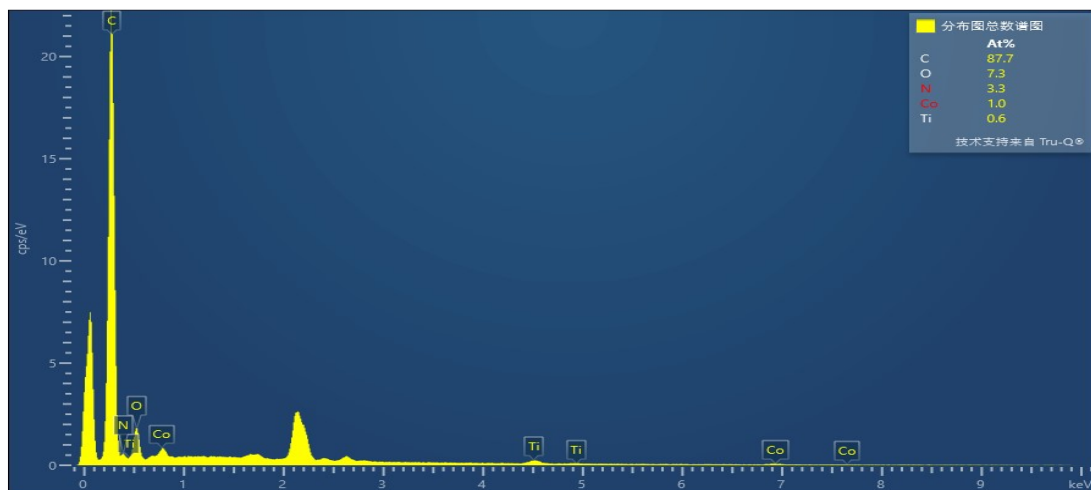

**Figure S8.** The EDS image of MXene@Por-COF-Co-7.



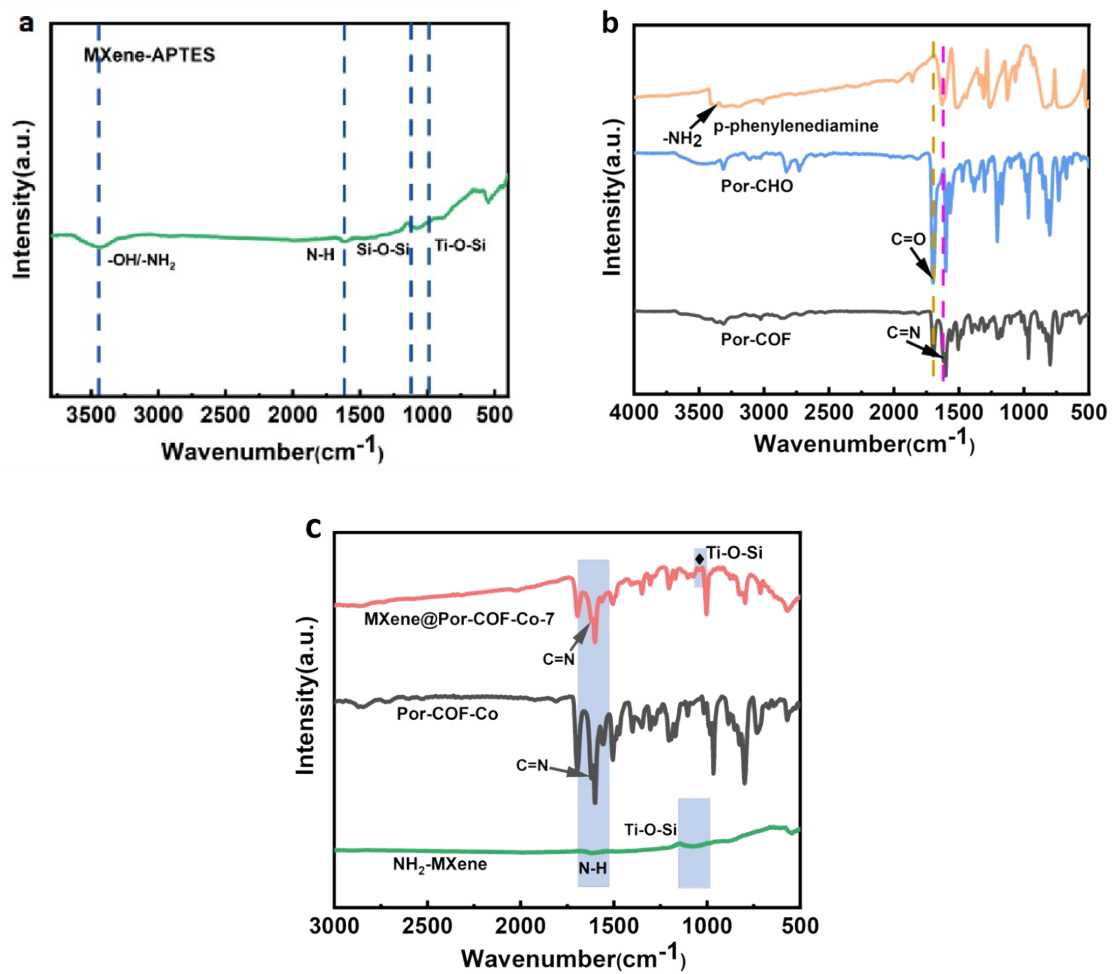

**Figure S9.** FTIR spectra of the (a) amino-functionalized  $\text{Ti}_3\text{C}_2$  MXene, (b) Por-COF compared with reactants of Por-CHO and p-phenylenediamine, (c) MXene@Por-COF-Co-7 compared with reactants of Por-COF-Co and  $\text{NH}_2\text{-MXene}$ .

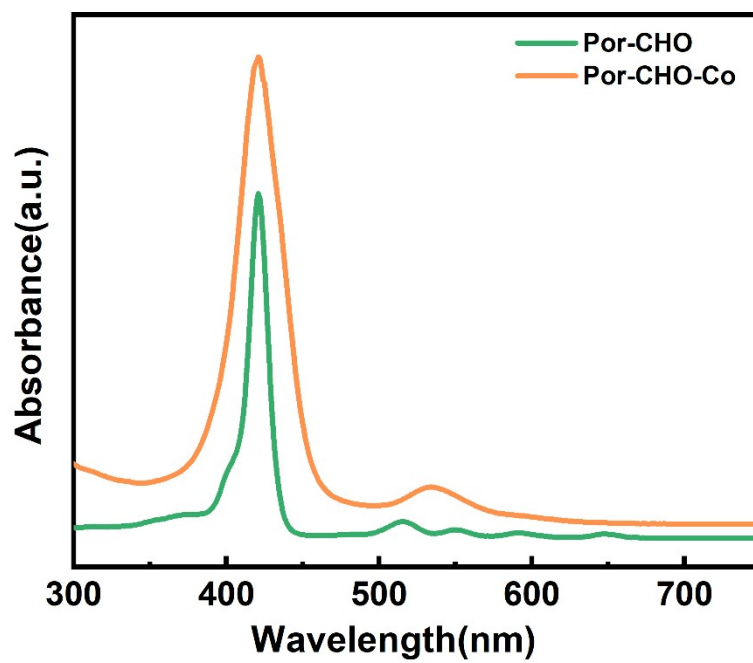

**Figure S10.** UV-vis spectra of Por- CHO, Por-CHO-Co.

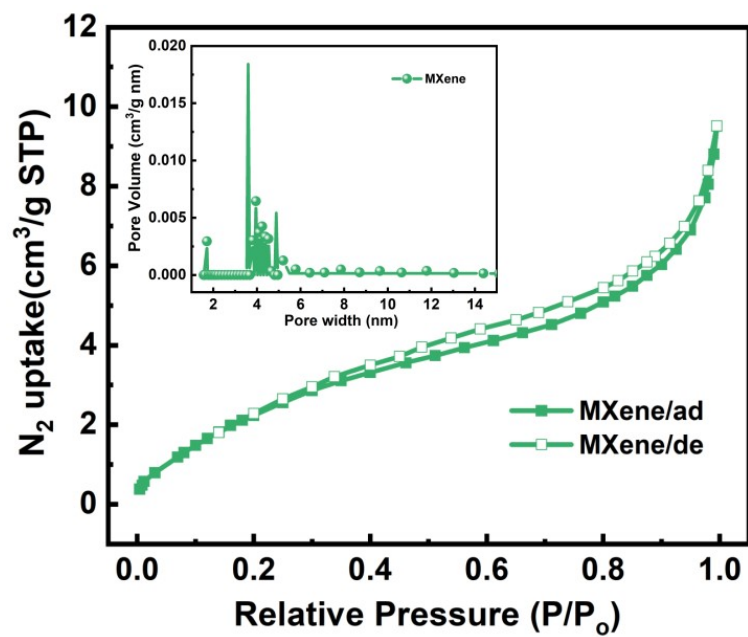

**Figure S11.** N<sub>2</sub> sorption isotherms of MXene at 77 K (inset pore-size distribution profile). The N<sub>2</sub> sorption revealed that MXene has Brunauer-Emmer Teller (BET) surface area 10.5771 m<sup>2</sup>g<sup>-1</sup>.

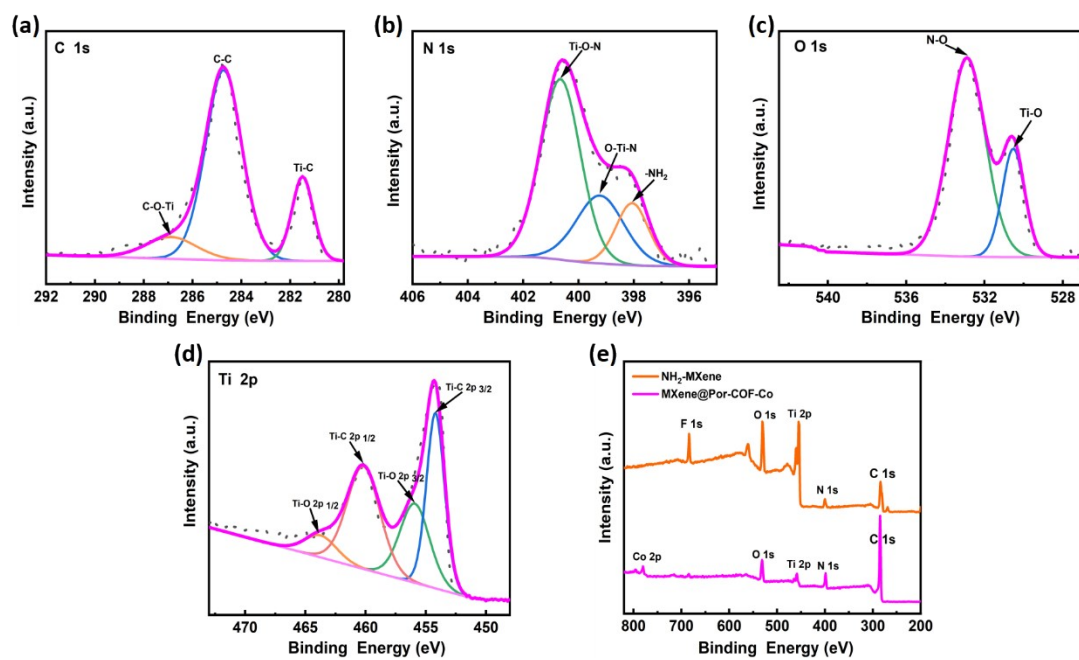

**Figure S12.** The XPS (a) C 1s, (b) N 1s, (c) O 1s and (d) Ti 2p spectra of the  $\text{NH}_2\text{-MXene}$ ; (e) XPS spectra of  $\text{NH}_2\text{-MXene}$  and  $\text{MXene@Por-COF-Co-7}$  heterostructure.

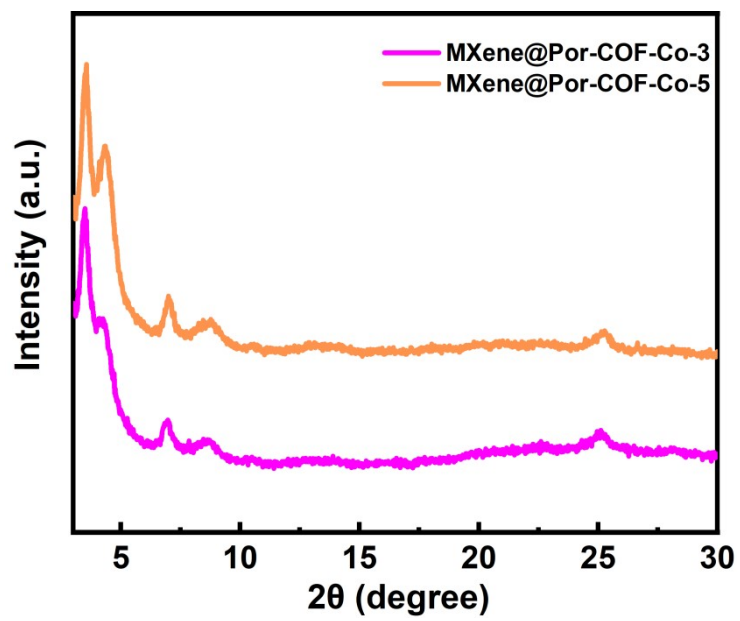

**Figure S13.** PXRD patterns of MXene@Por-COF-Co-3 and MXene@Por-COF-Co-5.

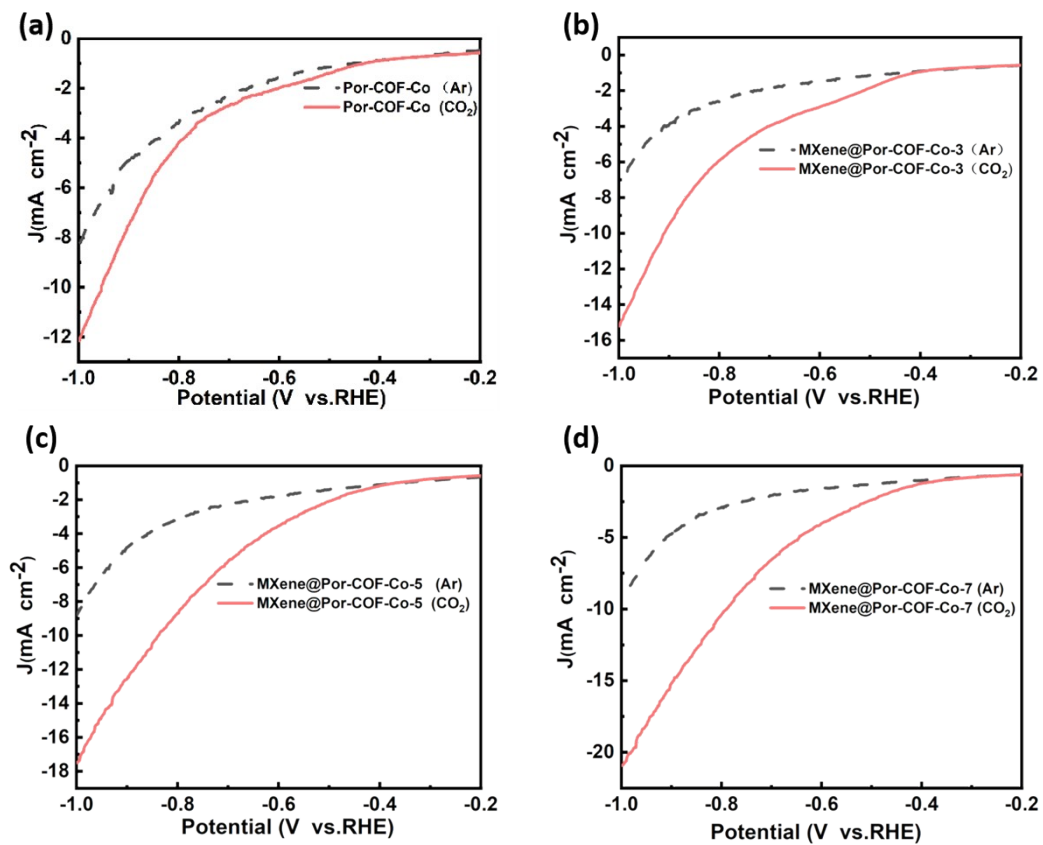

**Figure S14.** LSV curve in the Ar-saturated and CO<sub>2</sub>-saturated 0.5 M KHCO<sub>3</sub> electrolyte at a scan rate of 10 mV s<sup>-1</sup> for (a) Por-COF-Co, (b) MXene@Por-COF-Co-3, (c) MXene@Por-COF-Co-5, (d) MXene@Por-COF-Co-7.

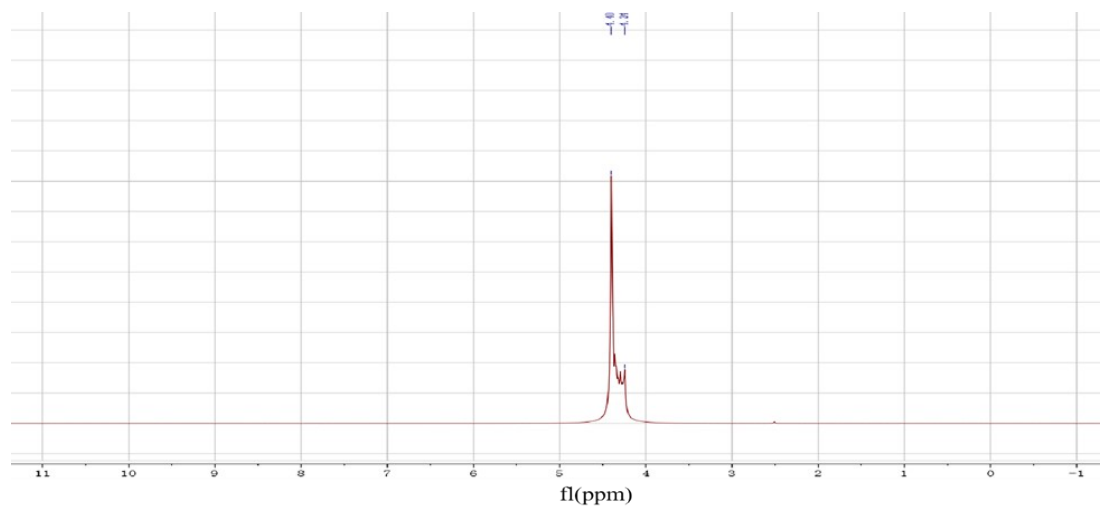

**Figure S15.** <sup>1</sup>H NMR spectra of MXene@Por-COF-Co for the electrolyte test after CO<sub>2</sub>RR in CO<sub>2</sub>-saturated 0.5 M KHCO<sub>3</sub>.

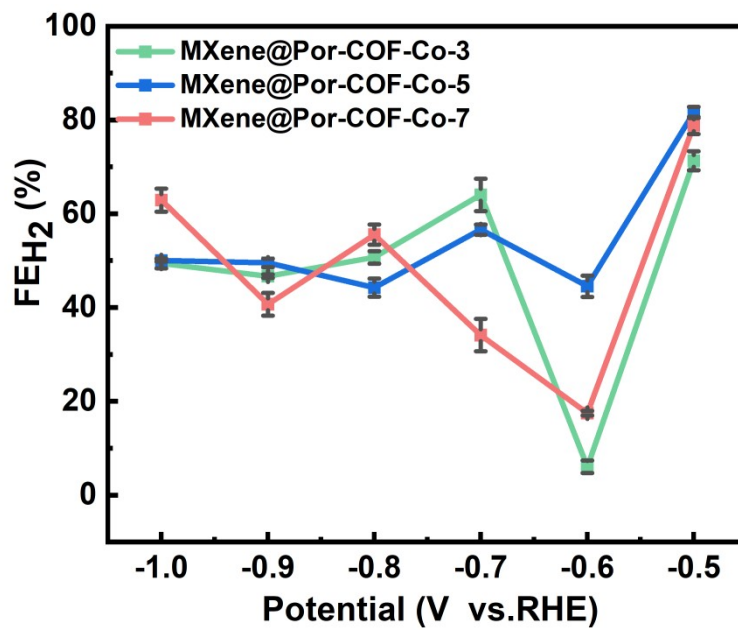

**Figure S16.** FE<sub>H<sub>2</sub></sub> from -0.5 to -1 V vs RHE of MXene@Por-COF-Co-3, MXene@Por-COF-Co-5 and MXene@Por-COF-Co-7.



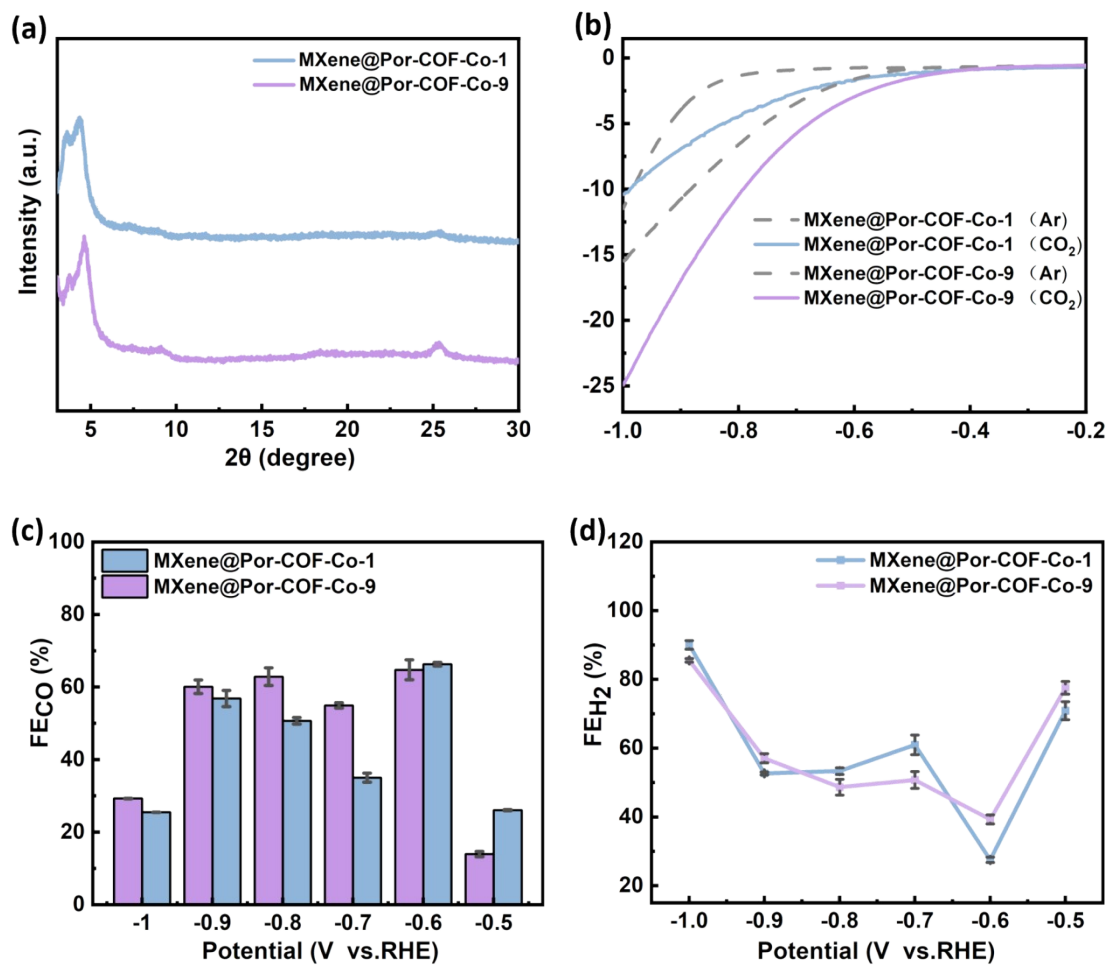

**Figure S17.** (a) PXRD patterns of MXene@Por-COF-Co-1, MXene@Por-COF-Co-9. (b) LSV curve in the Ar-saturated and CO<sub>2</sub>-saturated 0.5 M KHCO<sub>3</sub> electrolyte at a scan rate of 10 mV s<sup>-1</sup> for MXene@Por-COF-Co-1 and MXene@Por-COF-Co-9. (c) The FE<sub>CO</sub> calculated potential ranges from -0.5 to -1.0 V, (d) FE<sub>H<sub>2</sub></sub> from -0.5 to -1 V vs RHE of MXene@Por-COF-Co-1 and MXene@Por-COF-Co-9.

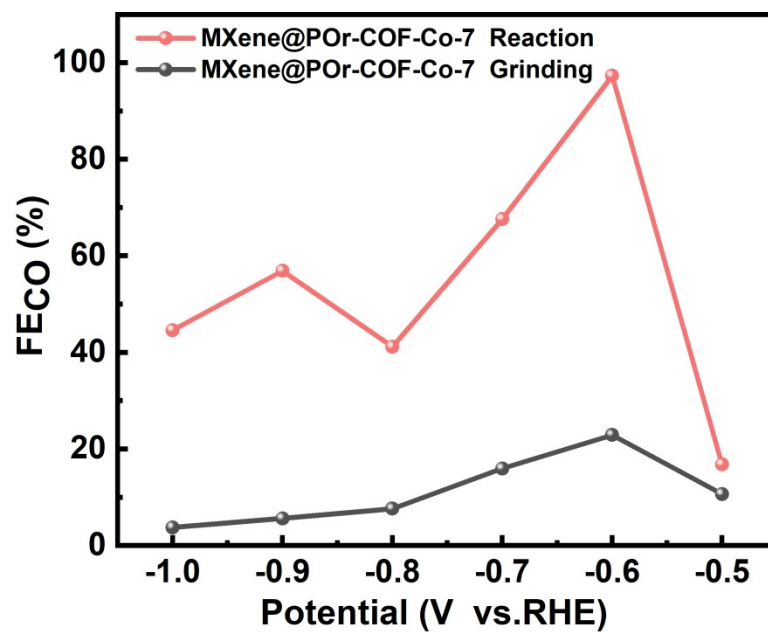

**Figure S18.** The FE<sub>CO</sub> from -0.5 to -1 V vs RHE of MXene@Por-COF-Co-7 and physical mixing NH<sub>2</sub>-MXene/Por-COF-Co.

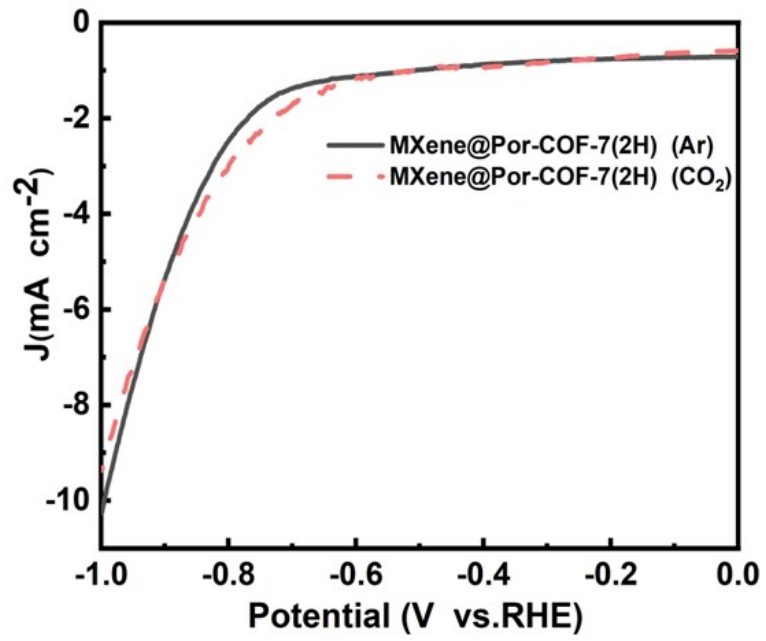

**Figure S19.** LSV curve in the Ar-saturated and CO<sub>2</sub>-saturated 0.5 M KHCO<sub>3</sub> electrolyte at a scan rate of 10 mV s<sup>-1</sup> for MXene@Por-COF(2H).

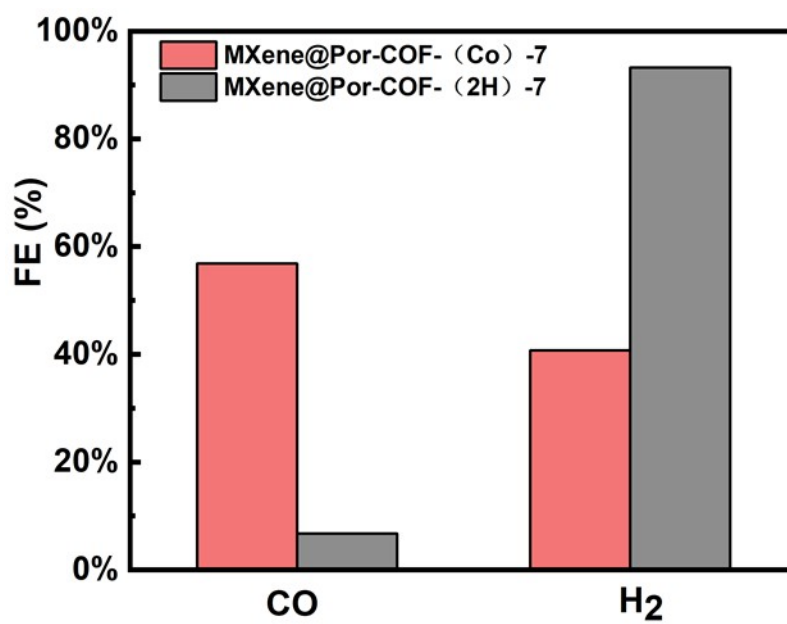

**Figure S20.** The selectivity and activity of the MXene@Por-COF-Co-7 and MXene@Por-COF(2H) were compared at -0.9 V vs. RHE using identical conditions.

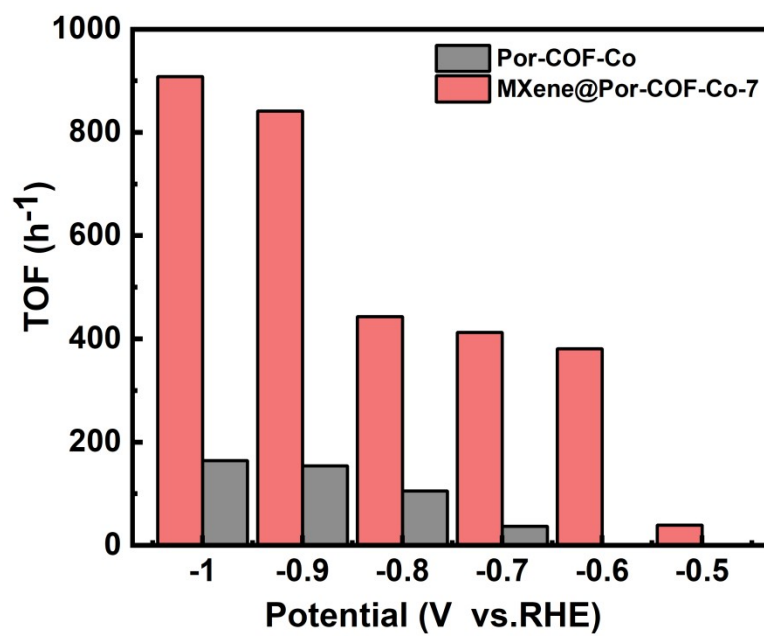

**Figure S21.** TOF ( $\text{h}^{-1}$ ) at different potentials for Por-COF-Co and MXene@Por-COF-Co-7.

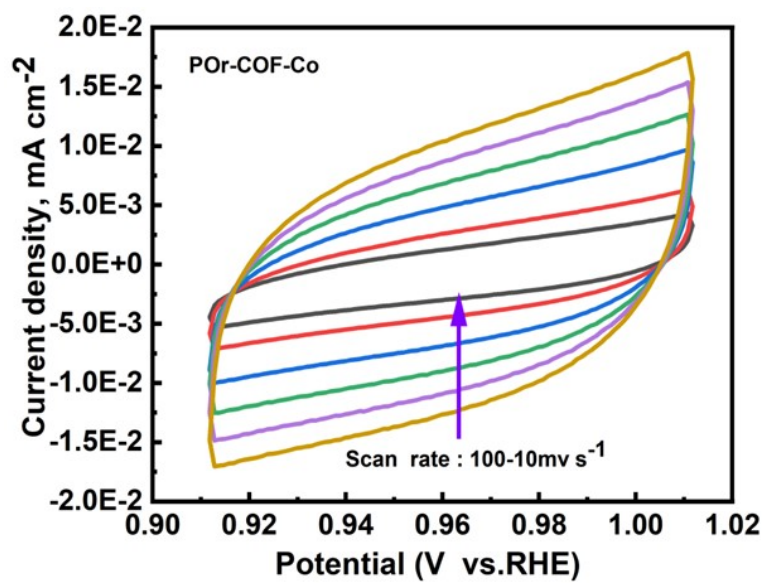

**Figure S22.** Cyclic voltammeters (CV) curves of Por-COF-Co in the region of 0.91 ~ 1.01 V vs. RHE at various scan rate (10 ~ 100 mV s<sup>-1</sup>).

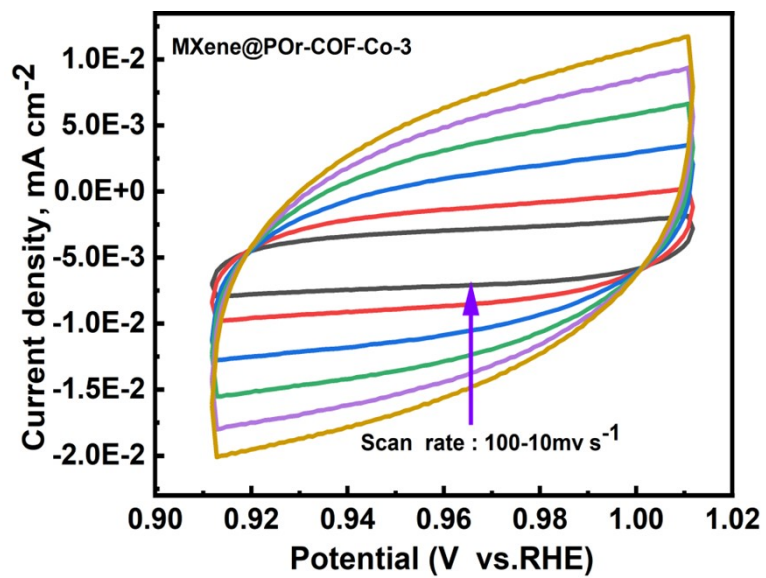

**Figure S23.** Cyclic voltammeters (CV) curves of MXene@Por-COF-Co-3 in the region of 0.91 ~ 1.01 V vs. RHE at various scan rate (10 ~ 100 mV s<sup>-1</sup>).

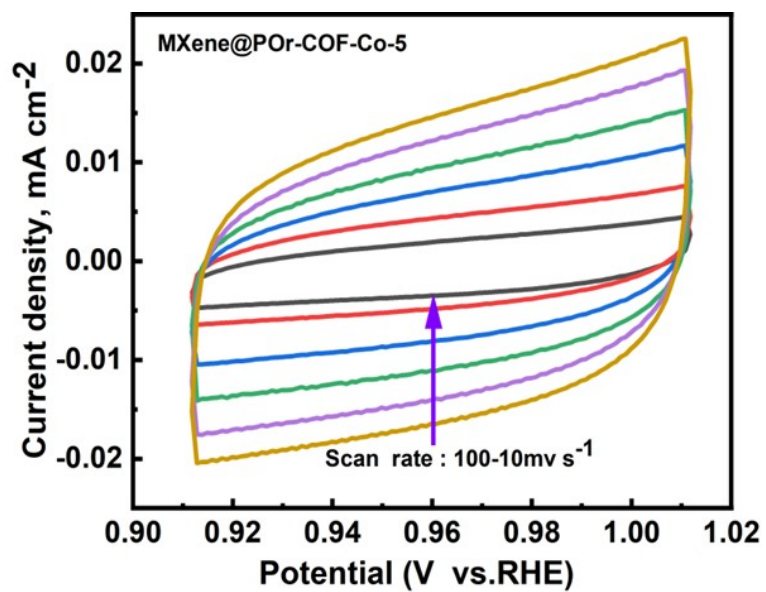

**Figure S24.** Cyclic voltammeters (CV) curves of MXene@Por-COF-Co-5 in the region of 0.91 ~ 1.01 V vs. RHE at various scan rate (10 ~ 100 mV s<sup>-1</sup>).



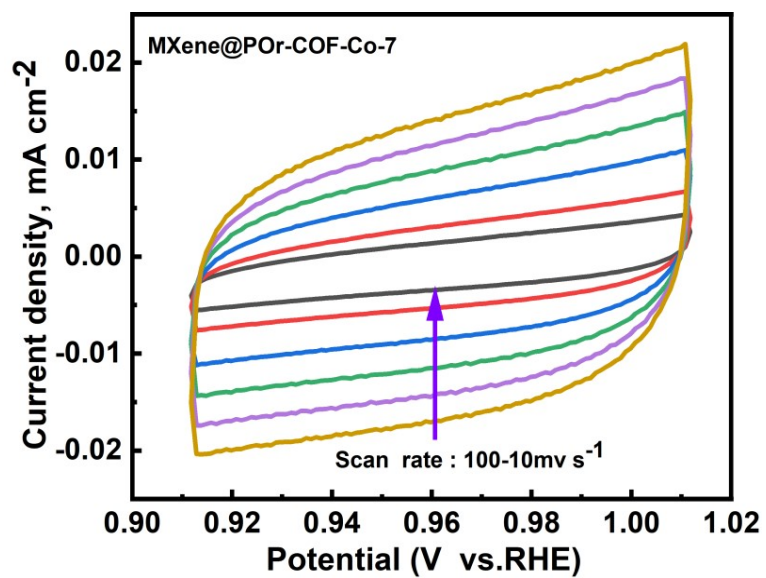

**Figure S25.** Cyclic voltammeters (CV) curves of MXene@Por-COF-Co-7 in the region of 0.91 ~ 1.01 V vs. RHE at various scan rate (10 ~ 100 mV s<sup>-1</sup>).

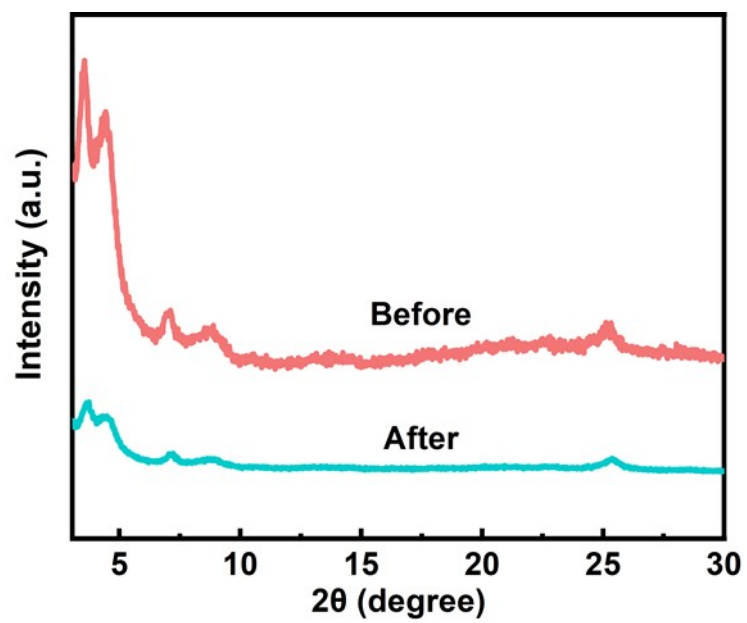

**Figure S26.** The XRD patterns before and after electrocatalytic CO<sub>2</sub>RR reaction of MXene@Por-COF-Co-7.

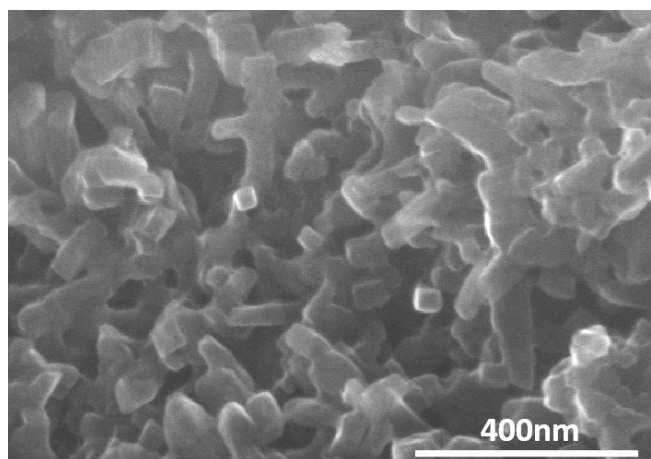

**Figure S27.** The SEM images of MXene@Por-COF-Co-7 after electrocatalytic CO<sub>2</sub>RR reaction.

**Table S1.** Comparison of catalyst with other reported high efficiency CO-selective CO<sub>2</sub> reduction electrocatalysts

| Catalyst                           | Electrolyte                   | Applied Potential (V vs RHE) | Faradaic efficiency of CO (%) | Reference        |
|------------------------------------|-------------------------------|------------------------------|-------------------------------|------------------|
| <b>MXene@Por-COF-Co-7</b>          | <b>0.5 M KHCO<sub>3</sub></b> | <b>-0.6</b>                  | <b>97.28</b>                  | <b>This work</b> |
| COF-366-Co                         | 0.5 M KHCO <sub>3</sub>       | -0.56                        | ~72                           | 1                |
| COF-367-Co                         | 0.5 M KHCO <sub>3</sub>       | -0.56                        | ~68                           | 1                |
| TTF-Por(Co)-COF                    | 0.5 M KHCO <sub>3</sub>       | -0.6                         | 90                            | 2                |
| CoPc-PDQ-COF                       | 0.5 M KHCO <sub>3</sub>       | -0.6                         | 85                            | 3                |
| COF-300-AR                         | 0.1 M KHCO <sub>3</sub>       | -0.7                         | 53                            | 4                |
| COF-366-(OMe) <sub>2</sub> -Co@CNT | 0.5 M KHCO <sub>3</sub>       | -0.58                        | ~92                           | 5                |
| Co-PMOF                            | 0.5 M KHCO <sub>3</sub>       | -0.6                         | ~70                           | 6                |
| CoFPc                              | 0.5M NaHCO <sub>3</sub>       | -0.6                         | 86                            | 7                |
| TCPP(Co)/Zr-BTB                    | 0.5 M KHCO <sub>3</sub>       | -0.6                         | ~60                           | 8                |
| Co@Pc/C                            | 0.5 M KHCO <sub>3</sub>       | -0.6                         | ~70                           | 9                |
| 2.5-CoPc/ZIS-180                   | 0.5 M KHCO <sub>3</sub>       | -0.6                         | 20                            | 10               |

## References

- 1 S. Lin, C. S. Diercks, Y. B. Zhang, N. Kornienko, E. M. Nichols, Y. B. Zhao, A. R. Paris, D. Kim, P. Yang, O. M. Yaghi and C. J. Chang, *Science*, 2015, 349, 1208-1213
- 2 Q. Wu, R. K. Xie, M. J. Mao, G. L. Chai, J. D. Yi, S. S. Zhao, Y. B. Huang and R. Cao, *ACS Energy*, 2020, 5, 1005-1012.
- 3 N. Huang, K. H. Lee, Y. Yue, X. Y. Xu, S. Irle, Q. H. Jiang and D. L. Jiang, *Angew. Chem., Int. Ed.*, 2020, 59, 16587-16593.
- 4 H. Y. Liu, J. Chu, Z. L. Yin, X. Cai, L. Zhuang and H. X. Deng, *Chem*, 2018, 4, 1696-1709.

- 5 Y. Lu, J. Zhang, W. B. Wei, D. D. Ma, X. T. Wu and Q. L. Zhu, *ACS Appl. Mater. Interfaces*, 2020, 12, 37986-37992.
- 6 Y. R. Wang, Q. Huang, C. T. He, Y. F. Chen, J. Liu, F. C. Shen and Y. Q. Lan, *Nat. Commun.*, 2018, 9, 8.
- 7 N. Morlanés, K. Takanahe and V. Rodionov, *ACS Catal.*, 2016, 6, 3092-3095.
- 8 X. D. Zhang, S. Z. Hou, J. X. Wu and Z. Y. Gu, *Chem.-Eur. J.*, 2020, 26, 1604-1611.
- 9 C. He, Y. Zhang, Y. F. Zhang, L. Zhao, L. P. Yuan, J. N. Zhang, J. M. Ma and J. S. Hu, *Angew. Chem., Int. Ed.*, 2020, 59, 4914-4919.
- 10 C. J. Chen, X. F. Sun, D. X. Yang, L. Lu, H. H. Wu, L. R. Zheng, P. F. An, J. Zhang and B. X. Han, *Chem. Sci.*, 2019, 10, 1659-1663.
